# Supplementary material for: Efficient hole extraction and dark current suppression in organic photodetectors enabled by atomic-layer-deposition of ultrathin Co3O4 interlayers
Source: Royal Society of Chemistry journal article supplement (doi:10.1039/d3tc00866e), 2023-01-01
Supplement: d3tc00866e1.pdf [file d3tc00866e1.pdf]

**Efficient Hole Extraction and Dark Current Suppression in Organic  
Photodetectors Enabled by Atomic-layer-deposition of Ultrathin Co<sub>3</sub>O<sub>4</sub> Interlayer**

*Ke Lu, Yuanhong Gao\*, Zhenhui Wang, Xinwei Wang, Hong Meng\**

School of Advanced Materials, Shenzhen Graduate School, Peking University,  
Shenzhen 518055, P. R. China

E-mail: yuanhong@pku.edu.cn

menghong@pku.edu.cn

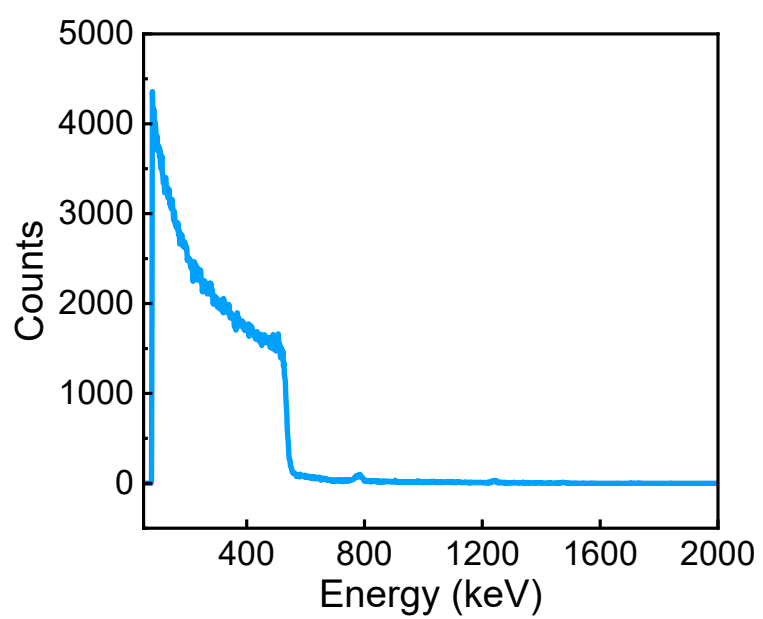

Fig. S1 RBS spectrum of the glass carbon

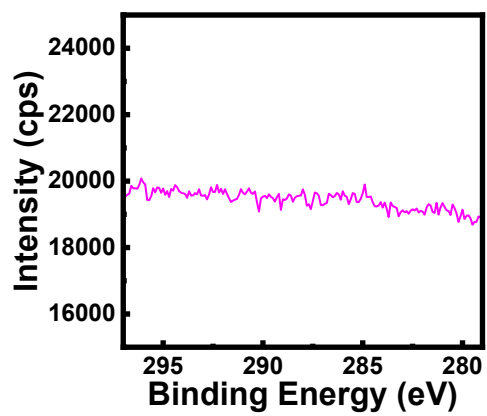

Fig. S2 XPS spectra of C 1s

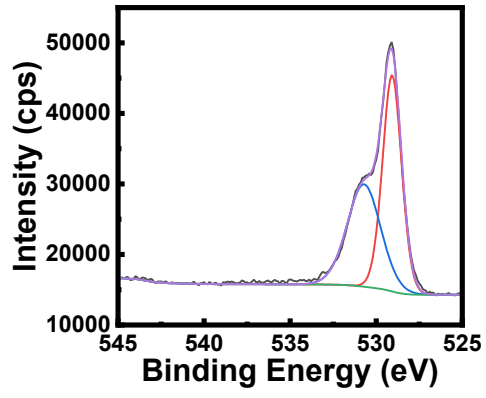

Fig. S3 O 1s spectra for a 10 nm  $\text{Co}_3\text{O}_4$  film (200 cycles)

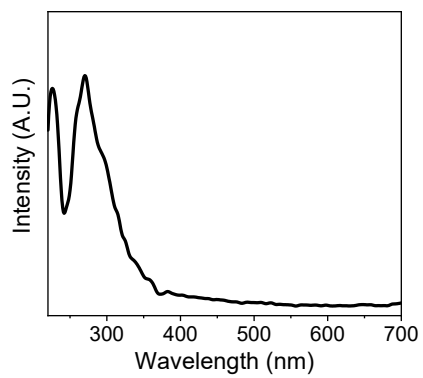

Fig. S4 UV-vis absorption spectra of the ALD Co<sub>3</sub>O<sub>4</sub> film (10 nm)

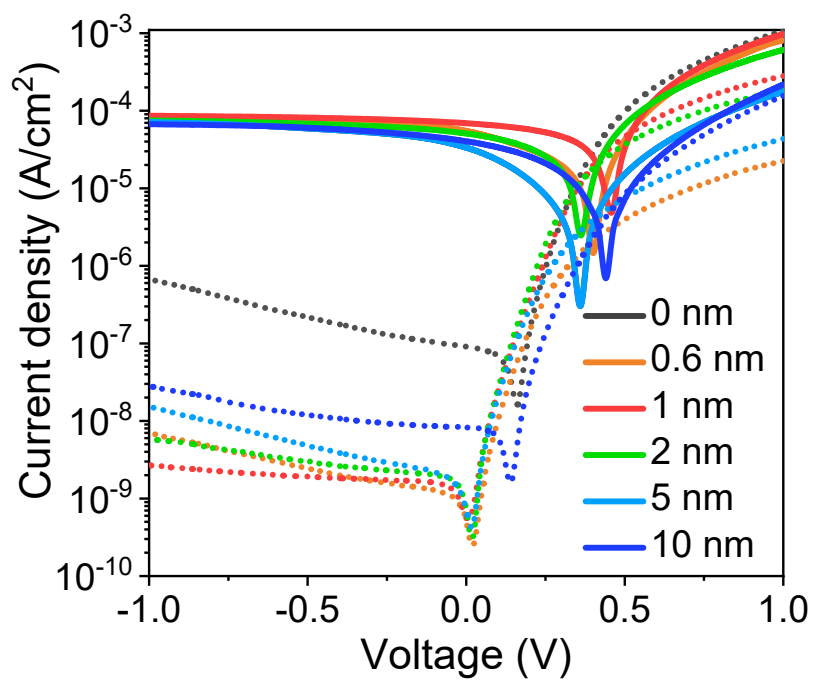

Fig. S5 J-V curves of the OPDs with different Co<sub>3</sub>O<sub>4</sub> thickness in dark and under the same light irradiation.

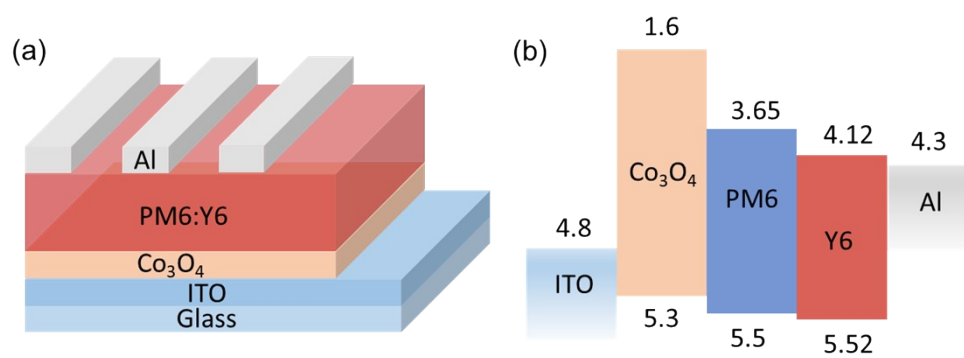

Fig. S6 (a) Structure of the OPD with a  $\text{Co}_3\text{O}_4$  anode interlayer. (b) Energy diagram of the OPD composed of ITO/  $\text{Co}_3\text{O}_4$ /PM6:Y6/ Al.
